# Supplementary material for: Development of an electrochemical sensor based on ternary oxide SiO2/Al2O3/SnO2 modified with carbon black for direct determination of clothianidin in environmental and food samples
Source: Royal Society of Chemistry journal article supplement (doi:10.1039/d3ay00732d), 2023-01-01
Supplement: d3ay00732d1.pdf [file d3ay00732d1.pdf]

## SUPPLEMENTARY MATERIAL

### **Development of an electrochemical sensor based on ternary oxide $\text{SiO}_2/\text{Al}_2\text{O}_3/\text{SnO}_2$ modified with carbon black for direct determination of clothianidin in environmental and food samples**

Francisco Walison Lima Silva<sup>1</sup>, Guilherme Barros de Oliveira<sup>1</sup>, Bráulio Soares Archanjo<sup>2</sup>, Bernardo Ferreira Braz<sup>1</sup>, Ricardo Erthal Santelli<sup>1,5</sup>, Emerson Schwingel Ribeiro<sup>3,4</sup>, Fernando Henrique Cincotto<sup>1,5</sup>  
\*. \*fernandocincotto@iq.ufrj.br

<sup>1</sup> Department of Analytical Chemistry, Institute of Chemistry, Federal University of Rio de Janeiro, Rio de Janeiro, Brazil.

<sup>2</sup> National Institute of Metrology, Quality and Technology, Inmetro-Xerém, Duque de Caxias, Brazil.

<sup>3</sup> Department of Inorganic Chemistry, Institute of Chemistry, Federal University of Rio de Janeiro, Rio de Janeiro, Brazil.

<sup>4</sup> Toxicological Assessment and Removal of Micro Pollutants and Radioactives (INCT-DATREM), Institute of Chemistry, Unesp, National Institute of Alternative Technologies for Detection, Araraquara (SP), Brazil.

<sup>5</sup> National Institute of Science & Technology of Bioanalytics (INCTBio), Campinas, Brazil

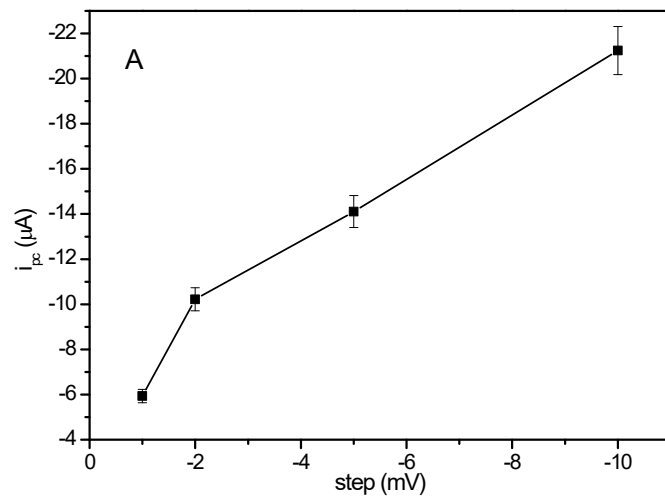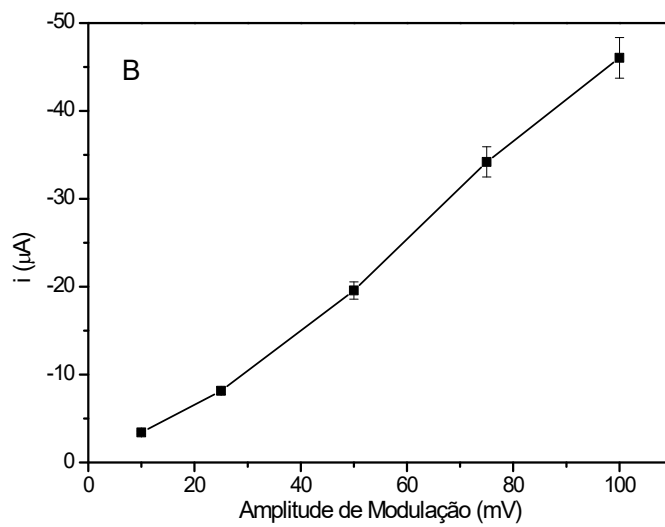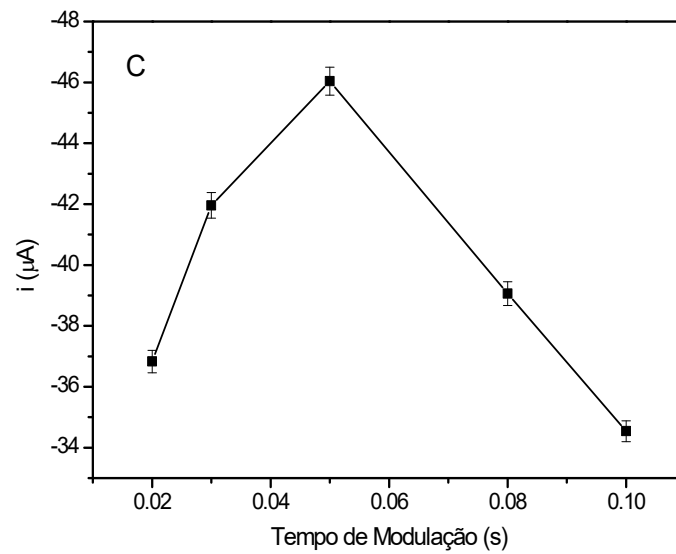

**Fig. S1** - Correlation graphs between peak current ( $i_p$ ) and parameter: (A) step, (B) modulation amplitude and (C) modulation time.

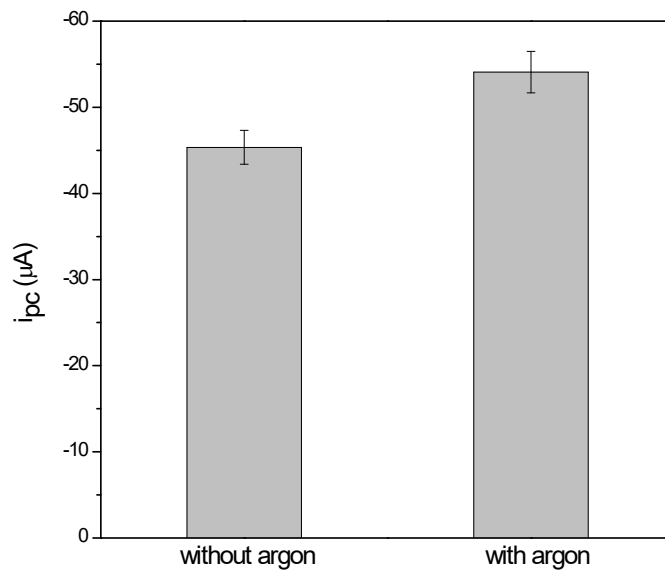

**Fig. S2** - Graphic representation of the response signal obtained for analysis of samples with and without argon bubbling

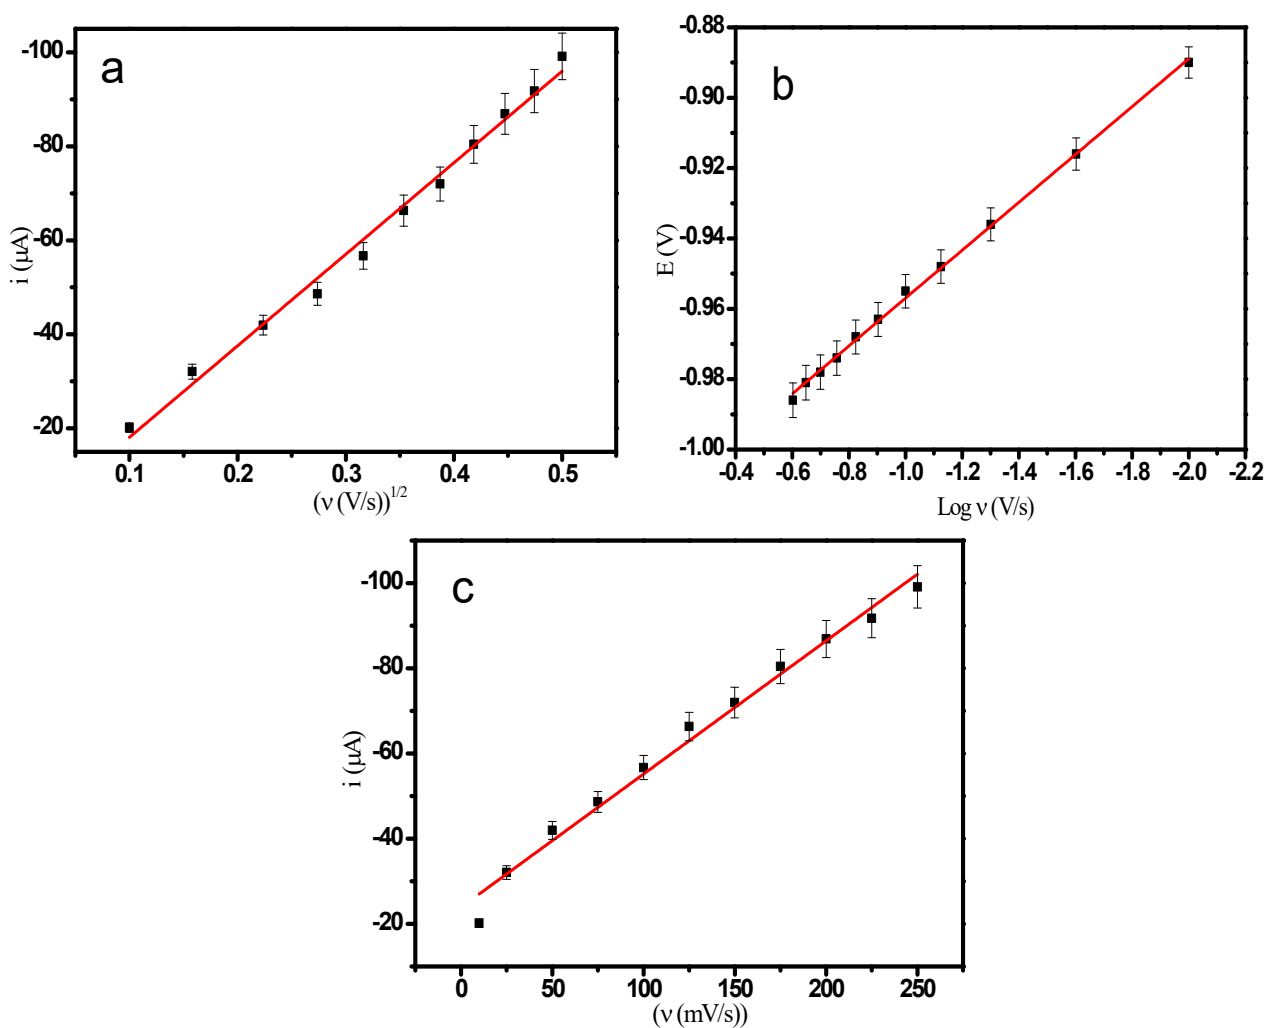

**Fig. S3** – (a) correlation graph between peak current with the square root of the sweep speed, (b) correlation graph between peak potential with the logarithm of the sweep speed and (c) correlation graph between peak current and the sweep speed.

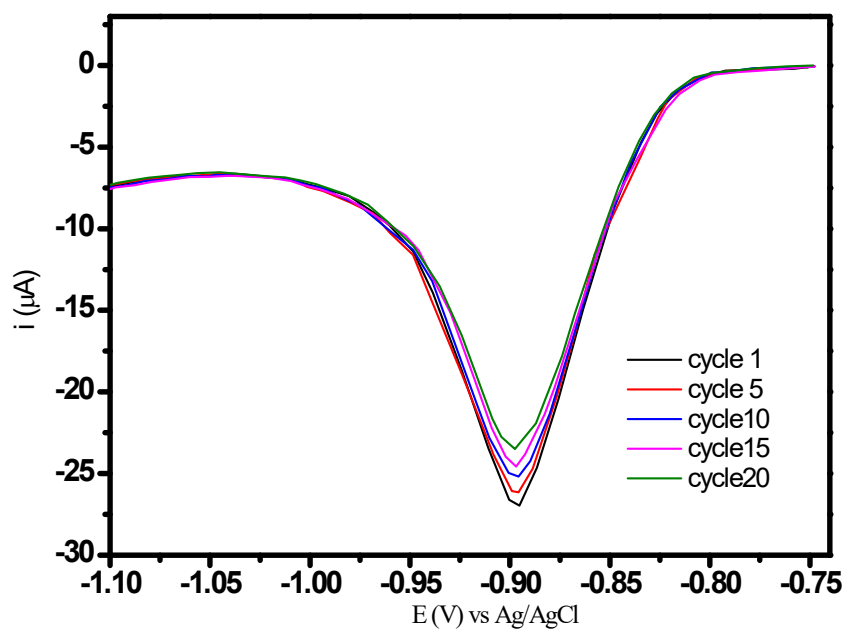

**Fig.S4** – DPV curves of  $60,0 \mu\text{mol L}^{-1}$  CLD at the GCE/CB/SiAlSn of the 20 successive measurements with the same electrode.

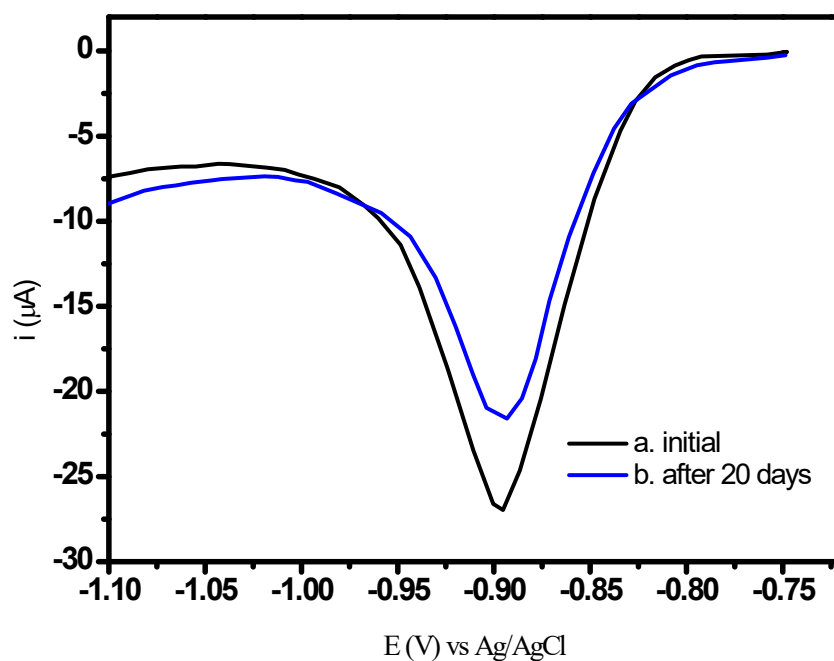

**Fig.S5** – DPV curves of  $60,0 \mu\text{mol L}^{-1}$  CLD at the GCE/CB/SiAlSn on the first day and 20 days later

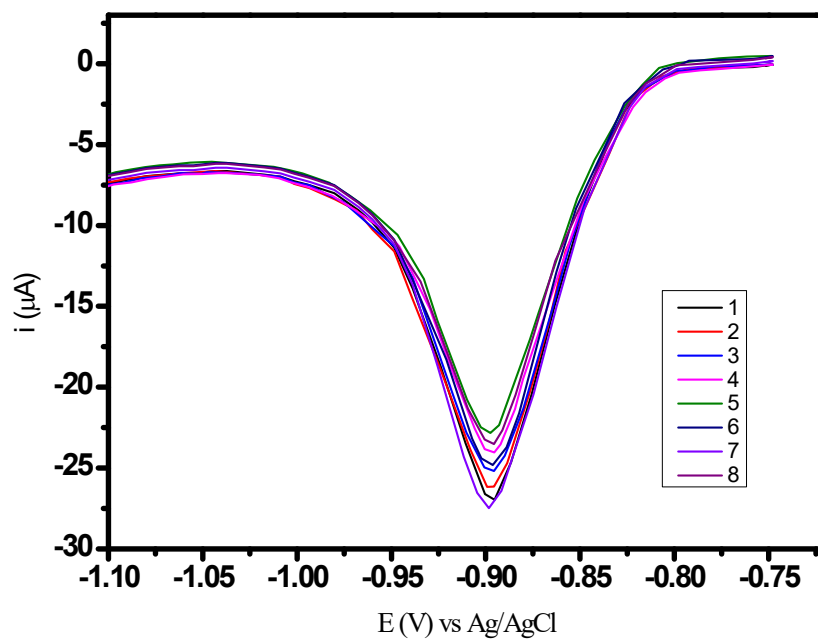

Fig.S6 – DPV curves of  $60.0 \mu\text{mol L}^{-1}$  of the CLD in the GCE/CB/SiAlSn of 8 different electrodes

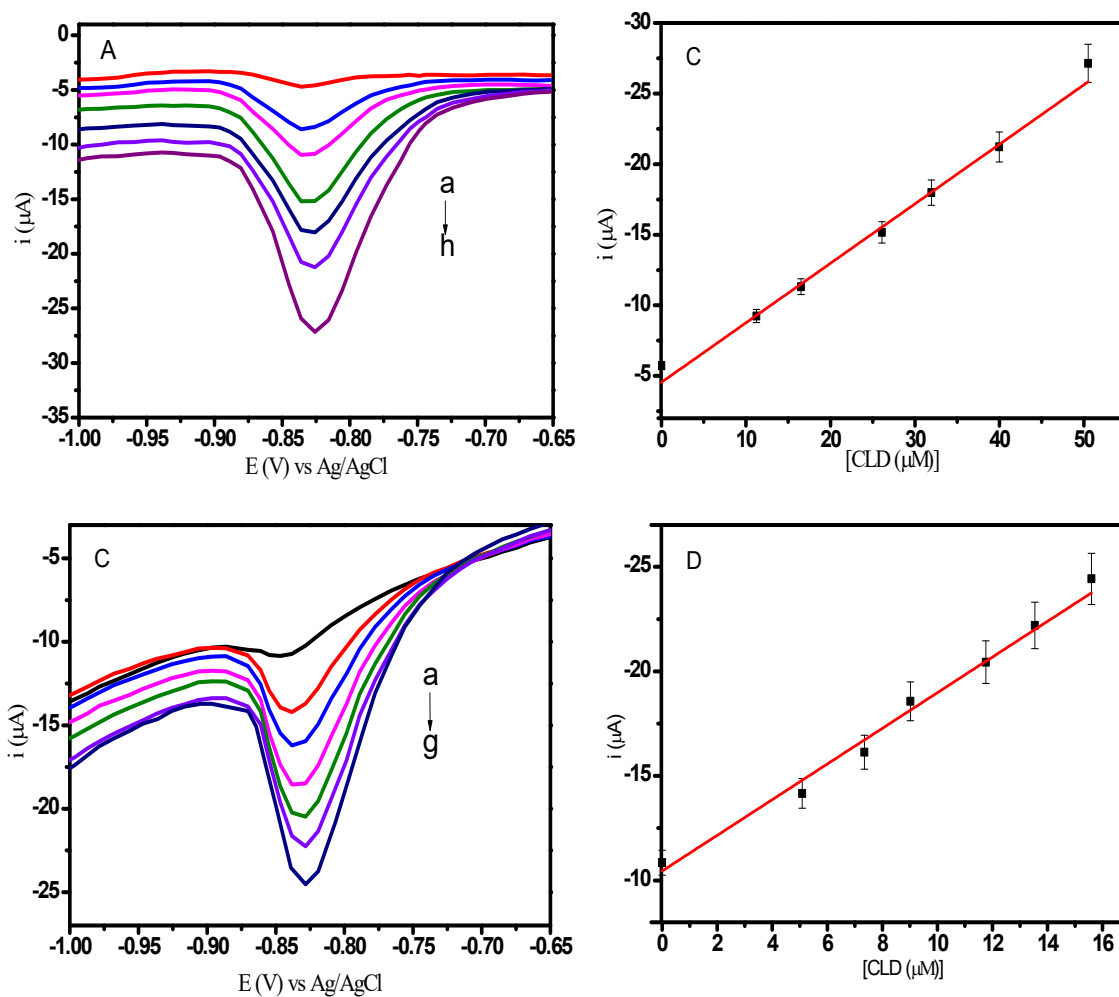

Fig. S7 - Voltammograms obtained in the determination of CLD in different environmental matrices, by DPV: (A) tap water (added  $10,49 \mu\text{mol L}^{-1}$ ) and (C) apple juice (added  $13,50 \mu\text{mol L}^{-1}$ ). Calibration curves using the standard addition method, (B) tap water and (D) apple juice.
